# Supplementary material for: Trajectories of Environmental Migrants: Understanding Migration Destinations of the Coastal Population in Kerala, India
Source: Springer Nature journal article supplement (doi:10.1007/s10745-024-00476-7), 2024-01-10
Supplement: 10745_2024_476_MOESM1_ESM.pdf [file 10745_2024_476_MOESM1_ESM.pdf]

**DEPARTMENT OF ARCHITECTURE AND PLANNING, INDIAN INSTITUTE OF TECHNOLOGY, KHARAGPUR**  
HOUSEHOLD SURVEY FORM

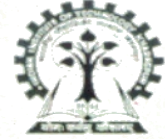

Surveyor's Name

Date

Telephone

Surveyee's Name

Location

Type of ULB: Panchayat/Municipality/ Municipal Corporation

Category: Migrant /Non-Migrant

1. Age of Head of Household:

2. Gender of Head of Household:

3. Marital Status of Head of Household:

4. Education of Head of Household:

5. Occupation of Head of Household:

6. Household Size:

7. No.of members below 15:

8. No.of members above 60:

9. Monthly Household Income:

10. No: of earning members:

11. No: of different income sources:

12. Is the house: Owned/Rented/Leased

13. Do you own any land? Y/N Cents:

14. Vehicles owned: Motorbike/Car

15. Commercial use vehicles owned: Autorickshaw/Boat

16. Age of House:

17. Building Level: Ground/Stilt/Higher foundation

18. No. of Floors:

19. Roof Material

20. Wall Material

21. Floor Material

G-Grass/Thatch/Bamboo, P-Plastic/Polythene, T-Tiles, W-Wood, S-Slate/Stone, Sh-G.I./Metal/Absestos Sheets, B-Burnt Brick, M-Mud/Unburnt Brick, C-Concrete, O-Others

22. Do you have any know anyone who migrated? How many and where?

| Category       | Intra village/ULB | Into villages/ULB within same district | Inter-district | Inter-state | International |
|----------------|-------------------|----------------------------------------|----------------|-------------|---------------|
| Family Members |                   |                                        |                |             |               |
| Relatives      |                   |                                        |                |             |               |
| Neighbours     |                   |                                        |                |             |               |

23. Distance of house from coastline:

24. Is the coast eroding:

25. No: of distressing events experienced since residing here:

**26. Do you have experience of following events**

| Category                                      | None | Rare | Once a | 2-3 times a year | Once every 2-3 months | Every month | More |
|-----------------------------------------------|------|------|--------|------------------|-----------------------|-------------|------|
| Coastal Flood due to monsoon/high tide events |      |      |        |                  |                       |             |      |
| Storm surge/cyclone                           |      |      |        |                  |                       |             |      |
| Tsunami                                       |      |      |        |                  |                       |             |      |
| Random Flood events other than above          |      |      |        |                  |                       |             |      |

**27. Average depth of flood in you area (metres):**

**28. Average time taken for flood to recede in your area (hours):**

**29. Damage to house:** Completely destroyed/ Partially destroyed/ Structural damages/ Minor damage/ Damage to household items only/No damage

**30. Have you lost any of your land: Cents:**

**31. Out-of-pocket cost to recover & rebuild:**

**32. No: of deaths in the household due to these events:**

**33. No: of household members injured due to these events:**

**34. Self-precaution measures taken by household:**

**35. Do you have life/home insurance?**

**36. Coastal Protection Measures deployed:** Sea Wall/ Groyne/ Tetrapods/ Geotubes or bags/ Beach Nourishment/ Others

**37. Are the coastal protection measures effective?** (Scale of 1-5)

**38. How effective was the local authority's response to the disaster?** (Scale of 1-5)

**39. Have you received any post-disaster relief/assistance from government: Money/Land/House/Other/None**

**If money, how much?**

**If land/house, how much area?**

**40. Risk Perception: How well do you agree to the following statements?** (Strongly Agree/Agree/Neutral/Disagree/Strongly Disagree)

a. I feel exposed to flood risk

b. It is likely that I could be harmed in a flood.

c. It is possible that I can die because of a flood

d. It is likely that I could be harmed in a flood more easily than other people in my city

e. To which level of flood risk is your area/neighbourhood subject?

**41. Place Attachment: How well do you agree to the following statements?** Strongly Agree/Agree/Neutral/Disagree/Strongly Disagree

- a. This neighbourhood is part of me
- b. This is the ideal place of me
- c. It would be very hard for me to leave this place
- d. I do not feel integrated to this place

**42. How satisfied are you with your house? (Scale 1-5)**

**43. If non-migrant, are you considering migration?**

**44. For migrants and the non-migrants considering migration, destination is:** Intra-village or ULB/ Intra-district/Inter-district/Inter-state/International

**45. How would you rate the role of the following in making you migrate or consider migration? (Scale 0-5, 0 being no influence and 5 being highest influence)**

- a. Climate/Environmental Issues
- b. Economically motivated
- c. Improving quality of life
- d. Conflict or social issues
- e. Others

**46. Who will migrate/migrated:** Single selected member/ All who can earn/ Everyone in the household

**47. How much importance do you give to the following factors while choosing a destination for migration?**

**(Scale 0-5, 0 being no influence and 5 being highest influence)**

- a. Climate/ Environmental Condition
- b. Proximity to your origin
- c. Social Proximity (social and cultural similarity to you)
- d. Presence of contacts in the destination
- e. Access to schools, healthcare and other social amenities
- f. Access to better physical infrastructure
- g. Availability of alternative livelihoods
- h. Difference in Wage
- i. Land Price or rent
- j. Cost of Living
- k. Ease in continuing the same livelihood at the destination

**48. For non-migrants, how would you rate the role of the following in preventing migration? (Scale 0-5, 0 being no influence and 5 being highest influence)**

- a. Place Attachment
- b. Financial Difficulties
- c. Poor Health
- d. Fear of loss of assets
- e. Lack of skillset for another livelihood
- f. I face no difficulty in living here

**FOR MIGRANTS**

**49. Type of migration:** Permanent/Temporary >1 year/Temporary < 1 year/ Seasonal

**50. Where are you staying presently:** Own house/ Rented house/ Govt. rehabilitated house/ Relatives' or Friends' house/ Relief camp/ Squatter Settlement/ Other

**52. Do you intend to go back to your previous area?** Y/N/Maybe

**53. If No, why:** I'm satisfied with destination / I have no land to go back to / I am not allowed

**54. Where did you go following the climate event?**

|        | Relief Camp | Own House | Rented House | Relatives'/Friends' House | Others |
|--------|-------------|-----------|--------------|---------------------------|--------|
| First  |             |           |              |                           |        |
| Second |             |           |              |                           |        |
| Third  |             |           |              |                           |        |
| Fourth |             |           |              |                           |        |
| Fifth  |             |           |              |                           |        |
